1 **Altered Temporal Variability of Local and Large-scale Resting-state Brain**  
2 **Functional Connectivity Patterns in Schizophrenia and Bipolar Disorder**

3 Yicheng Long<sup>1,2</sup>, Zhening Liu<sup>1,2</sup>, Calais Kin-yuen Chan<sup>3</sup>, Guowei Wu<sup>1,2</sup>, Zhimin Xue<sup>1,2</sup>,  
4 Yunzhi Pan<sup>2</sup>, Xudong Chen<sup>1,2</sup>, Xiaojun Huang<sup>1,2</sup> and Weidan Pu<sup>4,\*</sup>

5 <sup>1</sup>Department of Psychiatry, The Second Xiangya Hospital, Central South University,  
6 Changsha, Hunan, China;

7 <sup>2</sup>Mental Health Institute of Central South University, Changsha, Hunan, China;

8 <sup>3</sup>Department of Psychology, The University of Hong Kong, Hong Kong, China;

9 <sup>4</sup>Medical Psychological Center, The Second Xiangya Hospital, Central South University,  
10 Changsha, China;

11

12 \*Correspondence:

13 Dr. Weidan Pu

14 weidanpu@csu.edu.cn

15

16 **Number of words in the abstract:** 198

17 **Number of words in the main text:** 3726

18 **Number of figures:** 4

19 **Number of tables:** 1

20 **Number of supplementary materials:** 1

21

22 **Abstract:** Schizophrenia and bipolar disorder share some common clinical features and  
23 are both characterized by aberrant resting-state functional connectivity (FC). However,  
24 little is known about the common and specific aberrant features of the dynamic FC patterns  
25 in these two disorders. In this study, we explored the differences in dynamic FC among  
26 schizophrenia patients ( $n = 66$ ), type I bipolar disorder patients ( $n = 53$ ) and healthy  
27 controls ( $n = 66$ ), by comparing temporal variabilities of FC patterns involved in specific  
28 brain regions and large-scale brain networks. Compared with healthy controls, both patient  
29 groups showed significantly increased regional FC variabilities in subcortical areas  
30 including the thalamus and basal ganglia, as well as increased inter-network FC variability  
31 between the thalamus and sensorimotor areas. Specifically, more widespread changes were  
32 found in the schizophrenia group, involving increased FC variabilities in sensorimotor,  
33 visual, attention, limbic and subcortical areas at both regional and network levels, as well  
34 as decreased regional FC variabilities in the default-mode areas. The observed alterations  
35 shared by schizophrenia and bipolar disorder may help to explain their overlapped clinical  
36 features; meanwhile, the schizophrenia-specific abnormalities in a wider range may  
37 support that schizophrenia is associated with more severe functional brain deficits than  
38 bipolar disorder.

39 **Keywords:** dynamic functional connectivity; schizophrenia; bipolar disorder; thalamus;  
40 sensorimotor; basal ganglia

41

## 42 **1. Introduction**

43 Schizophrenia and bipolar disorder are two of the most disabling psychiatric disorders  
44 worldwide, which are often misdiagnosed in clinical practice because of their overlap in  
45 clinical features. These common features entail both cognitive deficits and psychotic  
46 symptoms including hallucinations, delusions and disorganized thinking (1–3). Over the  
47 years, neuroimaging studies using resting-state functional magnetic resonance imaging  
48 (rs-fMRI) have provided evidence for both shared and distinct disturbances in brain  
49 functions, as characterized by aberrant resting-state functional connectivity (FC), in the  
50 schizophrenia and bipolar disorder (4–7). For instance, when compared with healthy  
51 subjects, over-connectivity between the thalamus and sensorimotor cortices was  
52 commonly found in both schizophrenia and bipolar disorder patients (4). On the other  
53 hand, other unique abnormalities such as hypo-connectivity within frontal–parietal areas  
54 were shown only in schizophrenia but not bipolar disorder patients (7). Appreciably, these  
55 findings have significantly advanced our understanding of the complex relationship  
56 between these severe disorders.

57 Most previous rs-fMRI studies were performed under the assumption that patterns of  
58 brain FC are stationary during the entire scanning period. Yet, it has been newly proven  
59 that the brain FC fluctuates over time even during the resting-state, implying that  
60 conventional static FC methodology may be unable to fully depict the functional  
61 architecture of brain (8,9). Therefore, the “dynamic FC” has become a hot-spot in rs-fMRI  
62 studies to capture the temporal fluctuations of brain FC patterns during the scan (10).  
63 Notably, the dynamic features of FC have been associated with a wide range of cognitive  
64 and affective processes such as learning (11), executive cognition (12), psychological  
65 resilience (13) and emotion (14), as well as multiple common psychiatric and neurological  
66 disorders such as autism (15), Alzheimer's disease (16) and major depressive disorder  
67 (17,18). These findings thus highlight the importance of studying dynamic FC for further  
68 improving our understanding of both brain functions and dysfunctions.

69 Despite the accumulating knowledge on dynamic FC, it remains little known about if  
70 there are common and/or specific changes in dynamic features of FC in schizophrenia and  
71 bipolar disorder. To our knowledge, there have been only a limited number of efforts to  
72 date to differentiate schizophrenia and bipolar disorder by features of dynamic FC (19–21).  
73 Furthermore, all these studies mainly focus on the dynamic “connectivity state” changes  
74 based on the whole-brain FC profiles; therefore, although features of such global  
75 connectivity states have been reported to provide a high predictive accuracy in classifying  
76 schizophrenia and bipolar disorder (19–21), how these two disorders differ from each other  
77 in terms of dynamic connectivity profiles within particular brain regions or systems  
78 remains poorly understood, and needs to be further investigated.

79 The above concerns can be addressed by a novel approach, as proposed in some latest  
80 works (22,23), to investigate dynamic FC by defining and comparing the temporal  
81 variability of FC patterns involved in specific brain regions or large-scale brain networks.  
82 This approach allows localization of those brain regions or networks showing significant  
83 group differences in FC variability, thus being helpful to identify aberrant dynamic FC  
84 patterns from the perspectives of both local and large-scale brain functional dynamics (23).  
85 In fact, using such an approach, the patients with schizophrenia have been recently found  
86 to show increased FC variabilities in sensory and perceptual systems (e.g. the sensorimotor  
87 network and thalamus) and decreased FC variabilities in high-order networks (e.g. the

88 default-mode network) than healthy subjects at both regional and network levels (22). But  
89 to our knowledge, it remains unclear and needs to be tested whether these dynamic changes  
90 would be specific to schizophrenia, or shared with bipolar disorder.

91 Therefore, in this study, we aimed to explore the common and specific dynamic  
92 features of both local and large-scale resting-state FC, in terms of temporal variability, the  
93 schizophrenia and bipolar disorder. To reach this goal, groups of schizophrenia patients,  
94 bipolar disorder patients and healthy controls were recruited and scanned using rs-fMRI;  
95 applying a recently proposed novel methodological approach (22,23), temporal  
96 variabilities of FC patterns were then compared among the groups at all the regional,  
97 intra-network, and inter-network levels. It was anticipated that our results would provide  
98 important complementary information to prior studies that mainly focused on the global  
99 dynamic FC states (19–21), and further improve our understanding about the relationship  
100 between schizophrenia and bipolar disorder from a dynamic brain functional perspective.

## 101 **2. Materials and Methods**

### 102 **2.1. Subjects and measurements**

103 According to the Diagnostic and Statistical Manual of Mental Disorders-IV (DSM-IV)  
104 criteria, 78 patients with schizophrenia and 60 patients with type I bipolar disorder were  
105 recruited from the Second Xiangya Hospital of Central South University, Changsha,  
106 China; 69 age-, sex- and education- matched healthy controls without any family history of  
107 psychiatric disorders were also recruited from the Changsha city. All participants were  
108 right-handed, Han Chinese adults with at least 9 years of education. All participants had no  
109 history of any substance abuse, any other neurological disorder, any contraindication to  
110 fMRI scanning or any history of electroconvulsive therapy. Because of excessive head  
111 motion (see section 2.2), 12 schizophrenia patients, 7 bipolar disorder patients and 3  
112 healthy controls were excluded, and the final analyzed sample consisted of 66  
113 schizophrenia patients, 53 bipolar disorder patients and 66 healthy controls.

114 For the schizophrenia patients, severity of the current clinical symptoms was assessed  
115 using the Scale for Assessment of Positive Symptoms (SAPS) and the Scale for  
116 Assessment of Negative Symptoms (SANS) (24). For the patients with bipolar disorder,  
117 severity of the current mood and mania symptoms was assessed using the 17-item  
118 Hamilton Rating Scale for Depression (HAM-D) (25) and the Young Mania Rating Scale  
119 (YMRS) (26), respectively. Dosages of antipsychotics in all patients were converted to  
120 chlorpromazine equivalence (27). In addition, all participants completed the Information  
121 (WAIS-I) and Digit Symbol (WAIS-DS) subtests of the Wechsler Adult Intelligence Scale  
122 (28), which measure two important domains of cognitive functions, verbal comprehension  
123 and processing speed, respectively (29,30).

124 The study was approved by the Ethics Committee of the Second Xiangya Hospital of  
125 Central South University, and written informed consent was obtained from all participants.

### 126 **2.2. Data acquisition and preprocessing**

127 The details about brain imaging data acquisition and preprocessing can be found in one of  
128 our recently published studies (13). Briefly, rs-fMRI and T1-weighted structural images  
129 were scanned for each participant on a 3.0 T Philips MRI scanner (repetition time = 2000  
130 ms, echo time = 30 ms, slice number = 36, field of view = 240 × 240 mm<sup>2</sup>, acquisition matrix

131 =144×144, flip angle =90°, and number of time points = 250 for rs-fMRI images; repetition  
132 time time = 7.5 ms, echo time = 3.7 ms, slice number =180, field of view =240×240 mm<sup>2</sup>,  
133 acquisition matrix = 256×200, and flip angle =8° for T1-weighted images). Data  
134 preprocessing was performed using the standard pipeline of the DPARSF software  
135 (31,32), including discarding the first 10 volumes, slice timing, head motion realignment,  
136 brain segmentation, spatial normalization, temporal filtering (0.01-0.10 Hz), as well as  
137 regressing out white matter and cerebrospinal fluid signals. Global signal regression was  
138 not performed as it is still a controversial preprocessing option in rs-fMRI studies (33).  
139 Subjects with excessive head motion were excluded from the analysis, as determined by a  
140 mean framewise-displacement (FD) (34) > 0.2 mm.

### 141 2.3. Temporal variability of FC

142 After preprocessing, the mean time series were extracted from each of the 116 regions of  
143 interest (ROIs) in the Automated Anatomical Labeling (AAL) atlas (35), which was  
144 validated (36) and widely used in functional neuroimaging studies (37,38). The names of  
145 all the 116 ROIs were listed in **Supplementary Table S1**.

146 As shown in **Figure 1**, to characterize the temporal variability of FC, all the time  
147 series were segmented into  $n$  nonoverlapping time windows with a length of  $l$ . Within each  
148 time window, a  $116 \times 116$  pairwise Pearson correlation matrix was calculated to represent  
149 the FC between each pair of ROIs within that window. The temporal variability of regional  
150 FC architecture in each ROI could then be estimated by computing the mean values of its  
151 dissimilarities among different windows. Briefly, temporal variability of the regional FC  
152 architecture in ROI  $k$  is defined by Equation (1):

$$V_k = 1 - \overline{\text{corrcoef}(F(i, k), F(j, k))}, i, j = 1, 2, 3, \dots, n; i \neq j, \quad (1)$$

153 where  $n$  is the number of time windows, and  $F(i, k)$  is the vector characterizing the FC  
154 architecture between ROI  $k$  and the whole brain within the  $i$ th time window (**Figure 1**)  
155 (18,39,40).

156 The temporal variability of FC was further estimated at the network level following  
157 recently published procedures (22,23,41). First, all brain ROIs were assigned into eleven  
158 prior networks as defined in previous studies (42,43), including the sensorimotor network,  
159 visual network, auditory network, default-mode network, frontoparietal network,  
160 cingulo-opercular network, salience network, attention network, subcortical network,  
161 thalamus, and cerebellum (see **Supplementary Table S1** for details about the network  
162 assignments). Note that the thalamus and cerebellum were treated as two independent  
163 networks here, given that they were poorly defined into different networks as well as their  
164 special roles in the pathophysiologic mechanisms of psychotic disorders (22,44,45). The  
165 temporal variabilities of intra-network and inter-network FC architectures were then  
166 calculated among the above eleven networks. Similar with the regional FC variability for  
167 each ROI, the intra-network FC variability for a network  $m$  is defined by Equation (2):

$$V_m = 1 - \overline{\text{corrcoef}(F_{mi}, F_{mj})}, i, j = 1, 2, 3, \dots, n; i \neq j, \quad (2)$$

168 where  $n$  is the number of time windows, and  $F_{mi}$  is the vector characterizing the FC  
169 architecture between all ROIs belonging to the network  $m$  within the  $i$ th time window  
170 (**Figure 1**); the inter-network variability of FC between two networks  $m$  and  $n$  is defined by  
171 Equation (3):

$$V_{m-n} = 1 - \overline{\text{corrcoef}(F(i, m, n), F(j, m, n))}, i, j = 1, 2, 3, \dots, n; i \neq j, \quad (3)$$

172 where  $n$  is the number of time windows, and  $F(i, m, n)$  is the vector characterizing the FC  
173 architecture between the networks  $m$  and  $n$  within the  $i$ th time window (**Figure 1**)  
174 (22,23,41).

175 To reduce the influences from window length and segmentation scheme, all the above  
176 temporal variabilities were calculated with a set of different window lengths ( $l = 21, 22, \dots,$   
177  $30$  volumes, equal to  $42, 44, \dots, 60$  seconds) and for each window length of  $l$ , we  
178 performed the segmentation for  $(l - 1)$  times (starting from the first, second,  $\dots, (l - 1)$ th  
179 volumes at each time). The final values of temporal variabilities were obtained by  
180 averaging all of these values. Note that such a selection of window lengths has been used in  
181 previous studies, and was suggested to be optimal for producing robust results (46,47). As  
182 the result, in each subject, we finally obtained the temporal variabilities of regional FC for  
183 each of the 116 ROIs, intra-network FC for each of the 11 networks, and inter-network FCs  
184 for each possible pair of networks. All these values of temporal variabilities range from 0  
185 to 2, and a higher value suggests a higher variability.

## 186 2.4. Statistics

187 The demographic and clinical characteristics as well as mean FD were compared between  
188 groups using the two-sample  $t$ -test, Chi-square test or analysis of variance. Differences  
189 were considered significant at  $p < 0.05$ .

190 The temporal variabilities of FC patterns were compared between groups at all the  
191 regional, intra-network, and inter-network levels. The group differences were determined  
192 the by following statistic steps (46): 1) the analysis of covariance (ANCOVA) covarying  
193 for age, sex, education and head motion (mean FD) was firstly applied to detect the  
194 significant main effect; 2) post-hoc pairwise comparisons were adopted between all  
195 possible pairs of groups when the main effect was significant ( $p < 0.05$ ); 3) the Bonferroni  
196 correction was applied to control the false-positive rate for multiple tests within the  
197 ANCOVA, and the groups differences were considered significant at corrected- $p < 0.05$ .

198 For all the detected significant between-group differences, we further explored their  
199 possible relationships with the clinical and cognitive variables using Spearman's rank  
200 correlation coefficient. Here, they were correlated with the illness duration,  
201 chlorpromazine equivalence, SAPS scores, SANS scores, HAMD scores, YMRS scores,  
202 WAIS-I scores and WAIS-DS scores in each group separately. The correlations were  
203 considered significant at  $p < 0.05$ .

## 204 3. Results

### 205 3.1. Demographic, clinical and head motion characteristics

206 As shown in **Table 1**, there were no significant differences among the three groups in age,  
207 sex and education (all  $p > 0.05$ ). Shorter illness durations but higher antipsychotic doses  
208 (both  $p < 0.001$ ) were observed in the schizophrenia patients compared with the bipolar  
209 disorder patients. Both the schizophrenia and bipolar disorder groups showed significantly  
210 lower WAIS-I and WAIS-DS scores (all  $p < 0.05$ , LSD post-hoc comparisons) compared  
211 with healthy controls, while there was no significant difference between the schizophrenia

212 and bipolar disorder patients in WAIS-I and WAIS-DS scores. There was no significant  
213 difference among the three groups in head motion as measured by mean FD ( $F = 2.066$ ,  $p =$   
214  $0.130$ ).

### 215 **3.2. Differences in temporal variability of regional FC**

216 As shown in **Supplementary Table S2** and **Figure 2**, for temporal variability of the  
217 regional FC, both the schizophrenia and bipolar disorder patients showed significantly  
218 higher variabilities in a number of subcortical ROIs, including the thalamus and regions of  
219 the basal ganglia (putamen/pallidum) compared with healthy controls; the schizophrenia  
220 patients additionally showed significantly higher variabilities for a number of ROIs located  
221 in the sensorimotor (precentral gyrus and postcentral gyrus), attention (inferior parietal  
222 lobule) and limbic (hippocampus and amygdala) areas than healthy controls, as well as a  
223 significantly lower variability in the superior frontal gyrus (medial orbital) than healthy  
224 controls and a significantly lower variability in the posterior cingulate gyrus than bipolar  
225 disorder patients (all corrected- $p < 0.05$ ).

### 226 **3.3. Differences in temporal variability of intra- and inter-network FC**

227 As shown in **Supplementary Table S3** and **Figure 3**, for temporal variabilities of the  
228 intra-network FC within particular networks and inter-network FC between particular pairs  
229 of networks, both the schizophrenia and bipolar disorder patients showed a significantly  
230 higher variability for inter-network FC between the sensorimotor network and thalamus  
231 compared with healthy controls; the schizophrenia patients additionally showed  
232 significantly higher variabilities of both intra-network and inter-network FC than healthy  
233 controls for several networks and pairs of networks, which mainly involved the  
234 sensorimotor, visual and subcortical (including the thalamus) networks (all corrected  $p <$   
235  $0.05$ ).

### 236 **3.4. Correlations**

237 As shown in **Figures 4A** and **4B**, in the group of schizophrenia patients, significant  
238 correlations were found between temporal variability of regional FC for left hippocampus  
239 and the SANS scores (Spearman's  $\rho = 0.330$ ,  $p = 0.007$ , uncorrected for multiple tests),  
240 as well as between temporal variability of the inter-network FC between subcortical and  
241 auditory networks and the WAIS-I scores (Spearman's  $\rho = -0.286$ ,  $p = 0.020$ , uncorrected  
242 for multiple tests). No significant correlations were found in the groups of healthy controls  
243 and bipolar disorder patients ( $p > 0.05$ ).

## 244 **4. Discussion**

245 In this study, we explored the common and specific changes in dynamic local and  
246 large-scale resting-state FC, as characterized by altered temporal variabilities, across the  
247 schizophrenia and bipolar disorder. Our results provide some innovative findings on the  
248 dynamic functional architecture of the brain for these two severe mental disorders: firstly,  
249 we found that both the schizophrenia and bipolar disorder patients showed increased  
250 regional FC variabilities in a number of subcortical areas involving the thalamus and  
251 regions of basal ganglia, as well as increased inter-network FC variability between the  
252 sensorimotor cortices and thalamus; secondly, some specific abnormalities were found to

253 present only in the schizophrenia group, at both regional and network levels in a wider  
254 range. These findings provide valuable information for improving our insight into the  
255 neuropathology of these disorders from a dynamic brain functional perspective.

256 Our first important finding is that both the schizophrenia and bipolar disorder patients  
257 exhibited similar increased temporal variabilities of local FC in the thalamus (**Figure 2**), as  
258 well as of inter-network FC between the thalamus and sensorimotor cortices (**Figure 3**). It  
259 is noteworthy that shared neural disturbances in thalamo-cortical communications across  
260 schizophrenia and bipolar disorder, as characterized by similar over-connectivity between  
261 the thalamus and sensorimotor regions, have been repeatedly reported in several previous  
262 conventional static rs-fMRI studies (3,4). Our results, therefore, may extend such findings  
263 to the context of dynamic resting-state FC for the first time to our knowledge. The  
264 thalamus is known as a “relay station” for almost all motor and sensory information flow  
265 from and to the cortex, where the information is further processed for high-order brain  
266 functions (3,48). Specifically, aberrant communications between the thalamus and  
267 sensorimotor network were presumed to reflect a sensory gating deficit which leads to  
268 abnormal sensory information flow through the thalamus to the cortex (4,45,49). The  
269 observed increased temporal variability of thalamo-sensorimotor connectivity could thus  
270 point to such a sensory gating deficit, as abnormally increased temporal variability of FC  
271 was suggested to reflect excessive fluctuations in brain activities and inappropriate  
272 processing of information (22). As notably reported in both the schizophrenia and bipolar  
273 disorder patients (50–52), the sensory gating deficit has been suggested to partly underlie  
274 the cognitive and perceptual symptoms in the disorders (3,53). Therefore, our dynamic FC  
275 findings may further support the hypothesis that thalamo-sensorimotor connectivity  
276 disturbances and sensory gating deficits are common neurobiological features shared by  
277 schizophrenia and bipolar disorder (4,50).

278 In the present study, we also found that both the schizophrenia and bipolar disorder  
279 patients showed increased local FC variability in regions of the basal ganglia (putamen and  
280 pallidum) (**Figure 2**). The basal ganglia is a group of subcortical nuclei (putamen,  
281 pallidum, caudate nucleus, substantia nigra, and subthalamic nucleus) that involves a  
282 variety of brain functions such as motor control, learning, and execution (54). The  
283 functional and structural abnormalities of basal ganglia have been widely reported to be  
284 associated with psychotic symptoms such as delusions in schizophrenia patients (55–57),  
285 and also present in psychotic bipolar disorder patients (58). Therefore, our findings of such  
286 shared alterations in the basal ganglia may be reflective of common functional deficits in  
287 both the schizophrenia and bipolar disorder. These findings, together with the observed  
288 shared alterations in the thalamo-sensorimotor circuit, may partly help to explain the  
289 overlap clinical features in these two disorders.

290 Besides the above shared alterations in both patient groups, some specific alterations  
291 in a much wider range were found to present in only the schizophrenia patients. These  
292 include widespread increased FC variabilities at both regional and network levels,  
293 involving the sensorimotor, visual, attention, limbic and subcortical areas, as well as  
294 decreased regional FC variability in a number of areas comprising the default-mode  
295 network such as posterior cingulate gyrus and superior frontal gyrus (medial orbital part)  
296 (**Figure 2** and **Figure 3**). Generally, these results are highly consistent with the findings  
297 from another recent study (22), which reported that schizophrenia patients had  
298 significantly increased FC variabilities in sensory and perceptual systems (including the



299 sensorimotor network, visual network, attention network, and thalamus) and decreased FC  
300 variabilities in high-order networks (including the default-mode and frontal–parietal  
301 networks) than healthy subjects at both regional and network levels. Moreover, these  
302 alterations were found to be related to patients’ clinical symptoms and cognitive deficits  
303 both in the present study (**Figure 4**) and prior research (22). Therefore, our results further  
304 support the recent opinion that such widespread aberrant dynamic brain network  
305 reconfigurations may constitute a potential reliable biomarker for schizophrenia,  
306 suggestive of impaired abilities in processing inputs in sensory/perceptual systems and  
307 integrating information in high-order networks, which may underlie the perceptual and  
308 cognitive deficits in schizophrenia (22,59). As for the bipolar disorder patients in the  
309 present study, FC variabilities in these regions and networks did not differ significantly  
310 from either of the other groups, which fell in the intermediate range between those of  
311 healthy controls and schizophrenia patients (**Figure 2** and **Figure 3**). Thus, we propose  
312 that such findings may offer support for the hypothesis of a psychosis continuum between  
313 schizophrenia and bipolar disorder, with more severe brain deficits and disabling  
314 symptoms in schizophrenia compared to bipolar disorder (60,61). However, future  
315 investigation with a larger sample size and a higher statistical power is required to confirm  
316 if these changes would be significant in patients with bipolar disorder, as compared to  
317 healthy controls and schizophrenia patients.

318 There are several limitations of the present study and future research directions which  
319 should be noted. First, as mentioned before, our sample size is relatively small and the  
320 results should be further verified in future work with a larger sample to increase the  
321 reliability and statistical power (62). Second, the illness duration and doses of  
322 antipsychotics were not matched between the schizophrenia and bipolar disorder groups.  
323 Although no significant correlations were found between them and any detected group  
324 differences, which suggests that the observed group differences are unlikely to be mainly  
325 driven by medications or long-term hospitalizations, further studies using drug-naïve or  
326 matched samples for medication and illness duration are warranted to exclude their  
327 possible effects. Third, a number of previous studies have pointed out that the psychotic  
328 bipolar disorder may be a special phenotype from non-psychotic bipolar disorder (63,64).  
329 In the current sample, the records of psychotic symptom histories are unavailable for most  
330 bipolar disorder patients. Future studies are necessary to replicate our results and to  
331 compare between psychotic and non-psychotic bipolar disorder patients. Fourth, while  
332 many important results were found in the thalamus, we examined the thalamus as a single  
333 entity by the AAL atlas. However, the thalamus can be anatomically subdivided into  
334 multiple distinct nuclei with different FC patterns (44,65). Future studies to investigate the  
335 temporal variability of thalamo-cortical FC patterns within different sub-regions in the  
336 thalamus would further improve our understanding of its important role in the  
337 schizophrenia and bipolar disorder.

338 In conclusion, we explored the common and specific changes in dynamic features of  
339 FC, as characterized by temporal variabilities of FC patterns involved in specific brain  
340 regions or large-scale brain networks, in schizophrenia and bipolar disorder patients. We  
341 found that both the schizophrenia and bipolar disorder patients showed significantly  
342 increased regional FC variabilities in subcortical areas including the thalamus and basal  
343 ganglia, as well as increased inter-network FC variability between the sensorimotor  
344 cortices and thalamus. More widespread significant alterations were found to present in

345 only the schizophrenia group, including increased FC variabilities in the sensorimotor,  
346 visual, attention, limbic and subcortical areas at both regional and network levels, as well  
347 as decreased regional FC variability in the default-mode areas. The observed alterations  
348 shared by schizophrenia and bipolar disorder may help to explain their overlap clinical  
349 features; meanwhile, the schizophrenia-specific abnormalities in a wider range could  
350 potentially support the hypothesis of a psychosis continuum between schizophrenia and  
351 bipolar disorder, that schizophrenia is associated with more severe functional brain deficits  
352 compared to bipolar disorder.

353

#### 354 **AUTHOR CONTRIBUTIONS**

355 Authors YL and WP designed the study and carried out the analysis. YL, ZL, GW, ZX, YP,  
356 XC, XH and WP contributed to the data collection. YL wrote the first draft of manuscript.  
357 ZL, CKC and WP contributed to the final manuscript. All authors have read and agreed to  
358 the published version of the manuscript.

359

#### 360 **FUNDING**

361 This research was funded by the China Precision Medicine Initiative (grant number  
362 2016YFC0906300) and the National Natural Science Foundation of China (grant  
363 numbers 81561168021, 81671335, 81701325).

364

#### 365 **ACKNOWLEDGMENTS**

366 We thank Zhong He (Department of Radiology of Second Xiangya Hospital, Central South  
367 University) for his assistance in rs-fMRI data acquisition.

368

#### 369 **SUPPLEMENTARY MATERIAL**

370 The Supplementary Material for this article can be found online.

371

#### 372 **Conflict of Interest Statement:**

373 The authors declare no conflict of interest.

374

375 **References**

- 376 1. Meyer F, Meyer TD. The misdiagnosis of bipolar disorder as a psychotic disorder:  
377 Some of its causes and their influence on therapy. *J Affect Disord* (2009)  
378 **112**:174–183. doi:10.1016/j.jad.2008.04.022
- 379 2. Dezhina Z, Ranlund S, Kyriakopoulos M, Williams SCR, Dima D. A systematic  
380 review of associations between functional MRI activity and polygenic risk for  
381 schizophrenia and bipolar disorder. *Brain Imaging Behav* (2019) **13**:862–877.  
382 doi:10.1007/s11682-018-9879-z
- 383 3. Skåtun KC, Kaufmann T, Brandt CL, Doan NT, Alnæs D, Tønnesen S, Biele G,  
384 Vaskinn A, Melle I, Agartz I, et al. Thalamo-cortical functional connectivity in  
385 schizophrenia and bipolar disorder. *Brain Imaging Behav* (2018) **12**:640–652.  
386 doi:10.1007/s11682-017-9714-y
- 387 4. Anticevic A, Cole MW, Repovs G, Murray JD, Brumbaugh MS, Winkler AM,  
388 Savic A, Krystal JH, Pearlson GD, Glahn DC. Characterizing thalamo-cortical  
389 disturbances in Schizophrenia and bipolar illness. *Cereb Cortex* (2014)  
390 **24**:3116–3130. doi:10.1093/cercor/bht165
- 391 5. Meda SA, Gill A, Stevens MC, Lorenzoni RP, Glahn DC, Calhoun VD, Sweeney  
392 JA, Tamminga CA, Keshavan MS, Thaker G, et al. Differences in resting-state  
393 functional magnetic resonance imaging functional network connectivity between  
394 schizophrenia and psychotic bipolar probands and their unaffected first-degree  
395 relatives. *Biol Psychiatry* (2012) **71**:881–889. doi:10.1016/j.biopsych.2012.01.025
- 396 6. Birur B, Kraguljac NV, Shelton RC, Lahti AC. Brain structure, function, and  
397 neurochemistry in schizophrenia and bipolar disorder- A systematic review of the  
398 magnetic resonance neuroimaging literature. *npj Schizophr* (2017) **3**:  
399 doi:10.1038/s41537-017-0013-9
- 400 7. Mamah D, Barch DM, Repovš G. Resting state functional connectivity of five  
401 neural networks in bipolar disorder and schizophrenia. *J Affect Disord* (2013)  
402 **150**:601–609. doi:10.1016/j.jad.2013.01.051
- 403 8. Chang C, Glover GH. Time-frequency dynamics of resting-state brain connectivity  
404 measured with fMRI. *Neuroimage* (2010) **50**:81–98.  
405 doi:10.1016/j.neuroimage.2009.12.011

- 406 9. Hutchison RM, Womelsdorf T, Gati JS, Everling S, Menon RS. Resting-state  
407 networks show dynamic functional connectivity in awake humans and anesthetized  
408 macaques. *Hum Brain Mapp* (2013) **34**:2154–2177. doi:10.1002/hbm.22058
- 409 10. Preti MG, Bolton TA, Van De Ville D. The dynamic functional connectome:  
410 State-of-the-art and perspectives. *Neuroimage* (2017) **160**:41–54.  
411 doi:10.1016/j.neuroimage.2016.12.061
- 412 11. Bassett DS, Wymbs NF, Porter MA, Mucha PJ, Carlson JM, Grafton ST. Dynamic  
413 reconfiguration of human brain networks during learning. *Proc Natl Acad Sci U S A*  
414 (2011) **108**:7641–7646. doi:10.1073/pnas.1018985108
- 415 12. Braun U, Schäfer A, Walter H, Erk S, Romanczuk-Seiferth N, Haddad L, Schweiger  
416 JI, Grimm O, Heinz A, Tost H, et al. Dynamic reconfiguration of frontal brain  
417 networks during executive cognition in humans. *Proc Natl Acad Sci U S A* (2015)  
418 **112**:11678–11683. doi:10.1073/pnas.1422487112
- 419 13. Long Y, Chen C, Deng M, Huang X, Tan W, Zhang L, Fan Z, Liu Z. Psychological  
420 resilience negatively correlates with resting-state brain network flexibility in young  
421 healthy adults: a dynamic functional magnetic resonance imaging study. *Ann*  
422 *Transl Med* (2019) **7**: doi:10.21037/atm.2019.12.45
- 423 14. Betzel RF, Satterthwaite TD, Gold JJ, Bassett DS. Positive affect, surprise, and  
424 fatigue are correlates of network flexibility. *Sci Rep* (2017) **7**:  
425 doi:10.1038/s41598-017-00425-z
- 426 15. Harlalka V, Bapi RS, Vinod PK, Roy D. Atypical flexibility in dynamic functional  
427 connectivity quantifies the severity in autism spectrum disorder. *Front Hum*  
428 *Neurosci* (2019) **13**: doi:10.3389/fnhum.2019.00006
- 429 16. Schumacher J, Peraza LR, Firbank M, Thomas AJ, Kaiser M, Gallagher P, O'Brien  
430 JT, Blamire AM, Taylor JP. Dynamic functional connectivity changes in dementia  
431 with Lewy bodies and Alzheimer's disease. *NeuroImage Clin* (2019) **22**:  
432 doi:10.1016/j.nicl.2019.101812
- 433 17. Wise T, Marwood L, Perkins AM, Herane-Vives A, Joules R, Lythgoe DJ, Luh  
434 WM, Williams SCR, Young AH, Cleare AJ, et al. Instability of default mode  
435 network connectivity in major depression: A two-sample confirmation study. *Transl*  
436 *Psychiatry* (2017) **7**: doi:10.1038/tp.2017.40
- 437 18. Long Y, Cao H, Yan C, Chen X, Li L, Castellanos FX, Bai T, Bo Q, Chen G, Chen  
438 N, et al. Altered resting-state dynamic functional brain networks in major depressive

- 439 disorder: Findings from the REST-meta-MDD consortium. *NeuroImage Clin*  
440 (2020) doi:10.1016/j.nicl.2020.102163
- 441 19. Rashid B, Arbabshirani MR, Damaraju E, Cetin MS, Miller R, Pearlson GD,  
442 Calhoun VD. Classification of schizophrenia and bipolar patients using static and  
443 dynamic resting-state fMRI brain connectivity. *Neuroimage* (2016) **134**:645–657.  
444 doi:10.1016/j.neuroimage.2016.04.051
- 445 20. Rashid B, Damaraju E, Pearlson GD, Calhoun VD. Dynamic connectivity states  
446 estimated from resting fMRI Identify differences among Schizophrenia, bipolar  
447 disorder, and healthy control subjects. *Front Hum Neurosci* (2014) **8**:  
448 doi:10.3389/fnhum.2014.00897
- 449 21. Du Y, Pearlson GD, Lin D, Sui J, Chen J, Salman M, Tamminga CA, Ivleva EI,  
450 Sweeney JA, Keshavan MS, et al. Identifying dynamic functional connectivity  
451 biomarkers using GIG-ICA: Application to schizophrenia, schizoaffective disorder,  
452 and psychotic bipolar disorder. *Hum Brain Mapp* (2017) **38**:2683–2708.  
453 doi:10.1002/hbm.23553
- 454 22. Dong D, Duan M, Wang Y, Zhang X, Jia X, Li Y, Xin F, Yao D, Luo C.  
455 Reconfiguration of Dynamic Functional Connectivity in Sensory and Perceptual  
456 System in Schizophrenia. *Cereb Cortex* (2019) **29**:3577–3589.  
457 doi:10.1093/cercor/bhy232
- 458 23. Zhu H, Huang J, Deng L, He N, Cheng L, Shu P, Yan F, Tong S, Sun J, Ling H.  
459 Abnormal dynamic functional connectivity associated with subcortical networks in  
460 Parkinson’s disease: A temporal variability perspective. *Front Neurosci* (2019) **13**:  
461 doi:10.3389/fnins.2019.00080
- 462 24. Andreasen NC. Methods for assessing positive and negative symptoms. *Mod Probl*  
463 *Pharmacopsychiatry* (1990) **24**:73–88. doi:10.1159/000418013
- 464 25. Williams JBW. A Structured Interview Guide for the Hamilton Depression Rating  
465 Scale. *Arch Gen Psychiatry* (1988) **45**:742–747.  
466 doi:10.1001/archpsyc.1988.01800320058007
- 467 26. Young RC, Biggs JT, Ziegler VE, Meyer DA. A rating scale for mania: Reliability,  
468 validity and sensitivity. *Br J Psychiatry* (1978) **133**:429–435.  
469 doi:10.1192/bjp.133.5.429
- 470 27. Andreasen NC, Pressler M, Nopoulos P, Miller D, Ho BC. Antipsychotic Dose  
471 Equivalents and Dose-Years: A Standardized Method for Comparing Exposure to

- 472 Different Drugs. *Biol Psychiatry* (2010) **67**:255–262.  
473 doi:10.1016/j.biopsych.2009.08.040
- 474 28. Yao-xian G. Revision of Wechsler’s Adult Intelligence Scale in China. *Acta*  
475 *Psychol Sin* (1983) **15**:121–129. Available at: [http://118.145.16.229:81/Jweb\\_xlxb](http://118.145.16.229:81/Jweb_xlxb)
- 476 29. Long Y, Ouyang X, Liu Z, Chen X, Hu X, Lee E, Chen EYH, Pu W, Shan B,  
477 Rohrbaugh RM. Associations among suicidal ideation, white matter integrity and  
478 cognitive deficit in first-episode schizophrenia. *Front Psychiatry* (2018) **9**:  
479 doi:10.3389/fpsyt.2018.00391
- 480 30. Deng M, Pan Y, Zhou L, Chen X, Liu C, Huang X, Tao H, Pu W, Wu G, Hu X, et al.  
481 Resilience and Cognitive Function in Patients With Schizophrenia and Bipolar  
482 Disorder, and Healthy Controls. *Front Psychiatry* (2018) **9**:  
483 doi:10.3389/fpsyt.2018.00279
- 484 31. Chao-Gan Y, Yu-Feng Z. DPARSF: A MATLAB toolbox for “pipeline” data  
485 analysis of resting-state fMRI. *Front Syst Neurosci* (2010) **4**:  
486 doi:10.3389/fnsys.2010.00013
- 487 32. Yan CG, Wang X Di, Zuo XN, Zang YF. DPABI: Data Processing & Analysis for  
488 (Resting-State) Brain Imaging. *Neuroinformatics* (2016) **14**:339–351.  
489 doi:10.1007/s12021-016-9299-4
- 490 33. Murphy K, Fox MD. Towards a consensus regarding global signal regression for  
491 resting state functional connectivity MRI. *Neuroimage* (2017) **154**:169–173.  
492 doi:10.1016/j.neuroimage.2016.11.052
- 493 34. Jenkinson M, Bannister P, Brady M, Smith S. Improved optimization for the robust  
494 and accurate linear registration and motion correction of brain images. *Neuroimage*  
495 (2002) **17**:825–841. doi:10.1016/S1053-8119(02)91132-8
- 496 35. Tzourio-Mazoyer N, Landeau B, Papathanassiou D, Crivello F, Etard O, Delcroix  
497 N, Mazoyer B, Joliot M. Automated anatomical labeling of activations in SPM  
498 using a macroscopic anatomical parcellation of the MNI MRI single-subject brain.  
499 *Neuroimage* (2002) **15**:273–289. doi:10.1006/nimg.2001.0978
- 500 36. Termenon M, Jaillard A, Delon-Martin C, Achard S. Reliability of graph analysis of  
501 resting state fMRI using test-retest dataset from the Human Connectome Project.  
502 *Neuroimage* (2016) **142**:172–187. doi:10.1016/j.neuroimage.2016.05.062

- 503 37. Cao H, Bertolino A, Walter H, Schneider M, Schafer A, Taurisano P, Blasi G,  
504 Haddad L, Grimm O, Otto K, et al. Altered functional subnetwork during emotional  
505 face processing a potential intermediate phenotype for schizophrenia. *JAMA*  
506 *Psychiatry* (2016) **73**:598–605. doi:10.1001/jamapsychiatry.2016.0161
- 507 38. Piel JH, Lett TA, Wackerhagen C, Plichta MM, Mohnke S, Grimm O,  
508 Romanczuk-Seiferth N, Degenhardt F, Tost H, Witt S, et al. The effect of  
509 5-HTTLPR and a serotonergic multi-marker score on amygdala, prefrontal and  
510 anterior cingulate cortex reactivity and habituation in a large, healthy fMRI cohort.  
511 *Eur Neuropsychopharmacol* (2018) doi:10.1016/j.euroneuro.2017.12.014
- 512 39. Zhang J, Cheng W, Liu Z, Zhang K, Lei X, Yao Y, Becker B, Liu Y, Kendrick KM,  
513 Lu G, et al. Neural, electrophysiological and anatomical basis of brain-network  
514 variability and its characteristic changes in mental disorders. *Brain* (2016)  
515 **139**:2307–2321. doi:10.1093/brain/aww143
- 516 40. Mueller S, Wang D, Fox MD, Yeo BTT, Sepulcre J, Sabuncu MR, Shafee R, Lu J,  
517 Liu H. Individual Variability in Functional Connectivity Architecture of the Human  
518 Brain. *Neuron* (2013) **77**:586–595. doi:10.1016/j.neuron.2012.12.028
- 519 41. Sun J, Liu Z, Rolls ET, Chen Q, Yao Y, Yang W, Wei D, Zhang Q, Zhang J, Feng J,  
520 et al. Verbal creativity correlates with the temporal variability of brain networks  
521 during the resting state. *Cereb Cortex* (2019) **29**:1047–1058.  
522 doi:10.1093/cercor/bhy010
- 523 42. Cao H, Chung Y, McEwen SC, Bearden CE, Addington J, Goodyear B, Cadenhead  
524 KS, Mirzakhani H, Cornblatt BA, Carrión R, et al. Progressive reconfiguration of  
525 resting-state brain networks as psychosis develops: Preliminary results from the  
526 North American Prodrome Longitudinal Study (NAPLS) consortium. *Schizophr*  
527 *Res* (2019) doi:10.1016/j.schres.2019.01.017
- 528 43. Power JD, Cohen AL, Nelson SM, Wig GS, Barnes KA, Church JA, Vogel AC,  
529 Laumann TO, Miezin FM, Schlaggar BL, et al. Functional Network Organization of  
530 the Human Brain. *Neuron* (2011) **72**:665–678. doi:10.1016/j.neuron.2011.09.006
- 531 44. Ji JL, Spronk M, Kulkarni K, Repovš G, Anticevic A, Cole MW. Mapping the  
532 human brain's cortical-subcortical functional network organization. *Neuroimage*  
533 (2019) **185**:35–57. doi:10.1016/j.neuroimage.2018.10.006
- 534 45. Cao H, Chén OY, Chung Y, Forsyth JK, McEwen SC, Gee DG, Bearden CE,  
535 Addington J, Goodyear B, Cadenhead KS, et al. Cerebello-thalamo-cortical

- 536 hyperconnectivity as a state-independent functional neural signature for psychosis  
537 prediction and characterization. *Nat Commun* (2018) **9**:  
538 doi:10.1038/s41467-018-06350-7
- 539 46. Hou Z, Kong Y, He X, Yin Y, Zhang Y, Yuan Y. Increased temporal variability of  
540 striatum region facilitating the early antidepressant response in patients with major  
541 depressive disorder. *Prog Neuro-Psychopharmacology Biol Psychiatry* (2018)  
542 **85**:39–45. doi:10.1016/j.pnpbp.2018.03.026
- 543 47. Shirer WR, Ryali S, Rykhlevskaia E, Menon V, Greicius MD. Decoding  
544 subject-driven cognitive states with whole-brain connectivity patterns. *Cereb*  
545 *Cortex* (2012) **22**:158–165. doi:10.1093/cercor/bhr099
- 546 48. Sherman SM, Guillery RW. The role of the thalamus in the flow of information to  
547 the cortex. in *Philosophical Transactions of the Royal Society B: Biological*  
548 *Sciences*, 1695–1708. doi:10.1098/rstb.2002.1161
- 549 49. Çetin MS, Christensen F, Abbott CC, Stephen JM, Mayer AR, Cañive JM, Bustillo  
550 JR, Pearlson GD, Calhoun VD. Thalamus and posterior temporal lobe show greater  
551 inter-network connectivity at rest and across sensory paradigms in schizophrenia.  
552 *Neuroimage* (2014) **97**:117–126. doi:10.1016/j.neuroimage.2014.04.009
- 553 50. Sánchez-Morla EM, García-Jiménez MA, Barabash A, Martínez-Vizcaíno V, Mena  
554 J, Cabranes-Díaz JA, Baca-Baldomero E, Santos JL. P50 sensory gating deficit is a  
555 common marker of vulnerability to bipolar disorder and schizophrenia. *Acta*  
556 *Psychiatr Scand* (2008) **117**:313–318. doi:10.1111/j.1600-0447.2007.01141.x
- 557 51. Cheng CH, Chan PYS, Liu CY, Hsu SC. Auditory sensory gating in patients with  
558 bipolar disorders: A meta-analysis. *J Affect Disord* (2016) **203**:199–203.  
559 doi:10.1016/j.jad.2016.06.010
- 560 52. Hazlett EA, Rothstein EG, Ferreira R, Silverman JM, Siever LJ, Olincy A. Sensory  
561 gating disturbances in the spectrum: Similarities and differences in schizotypal  
562 personality disorder and schizophrenia. *Schizophr Res* (2015) **161**:283–290.  
563 doi:10.1016/j.schres.2014.11.020
- 564 53. Cromwell HC, Mears RP, Wan L, Boutros NN. Sensory gating: A translational  
565 effort from basic to clinical science. *Clin EEG Neurosci* (2008) **39**:69–72.  
566 doi:10.1177/155005940803900209
- 567 54. Haber SN. The primate basal ganglia: Parallel and integrative networks. in *Journal*  
568 *of Chemical Neuroanatomy*, 317–330. doi:10.1016/j.jchemneu.2003.10.003



- 569 55. Huang X, Pu W, Li X, Greenshaw AJ, Dursun SM, Xue Z, Liu H, Liu Z. Decreased  
570 left putamen and thalamus volume correlates with delusions in first-episode  
571 schizophrenia patients. *Front Psychiatry* (2017) **8**: doi:10.3389/fpsyt.2017.00245
- 572 56. Raij TT, Mäntylä T, Kieseppä T, Suvisaari J. Aberrant functioning of the putamen  
573 links delusions, antipsychotic drug dose, and compromised connectivity in first  
574 episode psychosis-Preliminary fMRI findings. *Psychiatry Res - Neuroimaging*  
575 (2015) **233**:201–211. doi:10.1016/j.pscychresns.2015.06.008
- 576 57. Tao H, Wong GHY, Zhang H, Zhou Y, Xue Z, Shan B, Chen EYH, Liu Z. Grey  
577 matter morphological anomalies in the caudate head in first-episode psychosis  
578 patients with delusions of reference. *Psychiatry Res - Neuroimaging* (2015)  
579 **233**:57–63. doi:10.1016/j.pscychresns.2015.04.011
- 580 58. Karcher NR, Rogers BP, Woodward ND. Functional Connectivity of the Striatum in  
581 Schizophrenia and Psychotic Bipolar Disorder. *Biol Psychiatry Cogn Neurosci*  
582 *Neuroimaging* (2019) **4**:956–965. doi:10.1016/j.bpsc.2019.05.017
- 583 59. Zhang Y, Guo G, Tian Y. Increased temporal dynamics of intrinsic brain activity in  
584 sensory and perceptual network of schizophrenia. *Front Psychiatry* (2019)  
585 doi:10.3389/fpsyt.2019.00484
- 586 60. Pearlson GD. Etiologic, Phenomenologic, and Endophenotypic Overlap of  
587 Schizophrenia and Bipolar Disorder. *Annu Rev Clin Psychol* (2015) **11**:251–281.  
588 doi:10.1146/annurev-clinpsy-032814-112915
- 589 61. Sorella S, Lapomarda G, Messina I, Frederickson JJ, Siugzdaite R, Job R, Grecucci  
590 A. Testing the expanded continuum hypothesis of schizophrenia and bipolar  
591 disorder. Neural and psychological evidence for shared and distinct mechanisms.  
592 *NeuroImage Clin* (2019) **23**: doi:10.1016/j.nicl.2019.101854
- 593 62. Cao H, McEwen SC, Forsyth JK, Gee DG, Bearden CE, Addington J, Goodyear B,  
594 Cadenhead KS, Mirzakhani H, Cornblatt BA, et al. Toward leveraging human  
595 connectomic data in large consortia: Generalizability of fmri-based brain graphs  
596 across sites, sessions, and paradigms. *Cereb Cortex* (2019) **29**:1263–1279.  
597 doi:10.1093/cercor/bhy032
- 598 63. Glahn DC, Bearden CE, Barguil M, Barrett J, Reichenberg A, Bowden CL, Soares  
599 JC, Velligan DI. The Neurocognitive Signature of Psychotic Bipolar Disorder. *Biol*  
600 *Psychiatry* (2007) **62**:910–916. doi:10.1016/j.biopsych.2007.02.001

- 601 64. Mazzarini L, Colom F, Pacchiarotti I, Nivoli AMA, Murru A, Bonnin CM, Cruz N,  
602 Sanchez-Moreno J, Kotzalidis GD, Girardi P, et al. Psychotic versus non-psychotic  
603 bipolar II disorder. *J Affect Disord* (2010) **126**:55–60.  
604 doi:10.1016/j.jad.2010.03.028
- 605 65. Hua J, Blair NIS, Paez A, Choe A, Barber AD, Brandt A, Lim IAL, Xu F, Kamath  
606 V, Pekar JJ, et al. Altered functional connectivity between sub-regions in the  
607 thalamus and cortex in schizophrenia patients measured by resting state BOLD  
608 fMRI at 7T. *Schizophr Res* (2019) **206**:370–377. doi:10.1016/j.schres.2018.10.016
- 609  
610

611

**Table 1** Demographic, clinical and head motion characteristics of the three groups.

|                                    | Schizophrenia ( <i>n</i> = 66) | Bipolar disorder ( <i>n</i> = 53) | Healthy controls ( <i>n</i> = 66) | Group comparisons           |
|------------------------------------|--------------------------------|-----------------------------------|-----------------------------------|-----------------------------|
|                                    | (Mean ± SD)                    | (Mean ± SD)                       | (Mean ± SD)                       |                             |
| Age (years)                        | 24.318 ± 6.127                 | 25.340 ± 4.095                    | 23.379 ± 4.416                    | $F = 2.249, p = 0.108$      |
| Sex (male/female)                  | 38/28                          | 26/27                             | 28/38                             | $\chi^2 = 3.044, p = 0.218$ |
| Education (years)                  | 13.152 ± 2.061                 | 13.576 ± 2.578                    | 14.076 ± 2.200                    | $F = 2.745, p = 0.067$      |
| Illness duration (months)          | 22.214 ± 24.972 <sup>a</sup>   | 56.987 ± 53.907                   | /                                 | $t = -4.281, p < 0.001$     |
| Antipsychotics (taking/not taking) | 63/3                           | 38/15                             | /                                 | $\chi^2 = 3.609, p < 0.001$ |
| Fluoxetine equivalents (mg/day)    | 228.762 ± 155.296              | 108.047 ± 119.101                 | /                                 | $t = 4.663, p < 0.001$      |
| SAPS scores                        | 18.231 ± 13.828                | /                                 | /                                 | /                           |
| SANS scores                        | 31.636 ± 27.810                | /                                 | /                                 | /                           |
| 17-item HAMD scores                | /                              | 12.660 ± 9.265                    | /                                 | /                           |
| YMRS scores                        | /                              | 5.113 ± 8.257                     | /                                 | /                           |
| WAIS-I scores                      | 18.174 ± 4.143                 | 19.123 ± 4.410                    | 20.985 ± 4.774                    | $F = 6.773, p < 0.001^b$    |
| WAIS-DS scores                     | 65.182 ± 15.493                | 70.321 ± 14.997                   | 88.924 ± 13.014                   | $F = 48.263, p < 0.001^b$   |
| Mean FD                            | 0.095 ± 0.038                  | 0.082 ± 0.035                     | 0.086 ± 0.032                     | $F = 2.066, p = 0.130$      |

612 <sup>1</sup> The information on illness duration was available for 56 schizophrenia patients. <sup>2</sup> The LSD post-hoc  
613 comparisons set at  $p < 0.05$  showed that schizophrenia < healthy controls, and bipolar disorder < healthy  
614 controls, while there was no significant difference between the schizophrenia and bipolar disorder  
615 groups. SD, standard deviation; SAPS, Scale for Assessment of Positive Symptoms; SANS, Scale for  
616 Assessment of Negative Symptoms; HAMD, Hamilton Rating Scale for Depression; YMRS, Young  
617 Mania Rating Scale; WAIS-I, the Information subtest of the Wechsler Adult Intelligence Scale;  
618 WAIS-DS, the Digit Symbol subtest of the Wechsler Adult Intelligence Scale; FD,  
619 framewise-displacement.

620

621 **Figure Legends**

622

623 **Figure 1 The procedures for computing temporal variabilities of FC patterns.** Refer  
624 to the section 2.3, “Temporal Variability of FC” for details. FC, functional connectivity;  
625 ROI, region of interest.

626

627 **Figure 2 Group differences in the temporal variabilities of regional FC patterns.** The  
628 error bars present the 95% confidence intervals, and the marks “\*” indicate significant  
629 between-group differences with corrected  $p < 0.05$ . AMYG, amygdala; FC, functional  
630 connectivity; HIP, hippocampus; IPL, inferior parietal lobule; L, left hemisphere;  
631 ORBsupmed, superior frontal gyrus (medial orbital); PAL, pallidum; PCG, posterior  
632 cingulate gyrus; PoCG, postcentral gyrus; PreCG, precentral gyrus; PUT, putamen; R,  
633 right hemisphere; THA, thalamus.

634

635 **Figure 3 Group differences in the temporal variabilities of intra-network and**  
636 **inter-network FC patterns.** The error bars present the 95% confidence intervals, and the  
637 marks “\*” indicate significant between-group differences with corrected  $p < 0.05$ . AUD,  
638 auditory network; DMN, default mode network; FC, functional connectivity; SAL,  
639 salience network; SM, sensorimotor network; SUB, subcortical network; THA, thalamus;  
640 VIS, visual network.

641

642 **Figure 4 The detected significant correlations in schizophrenia patients. (A)**  
643 Correlation between the temporal variability of regional FC for left hippocampus and the  
644 Scale for Assessment of Negative Symptoms (SANS) scores. **(B)** Correlation between the  
645 temporal variability of inter-network FC between subcortical and auditory networks and  
646 the Information Subtest of the Wechsler Adult Intelligence Scale (WAIS-I) scores. The  
647 Spearman's correlation coefficients ( $\rho$ ) and  $p$  values are presented on figures.

Signals from each ROI

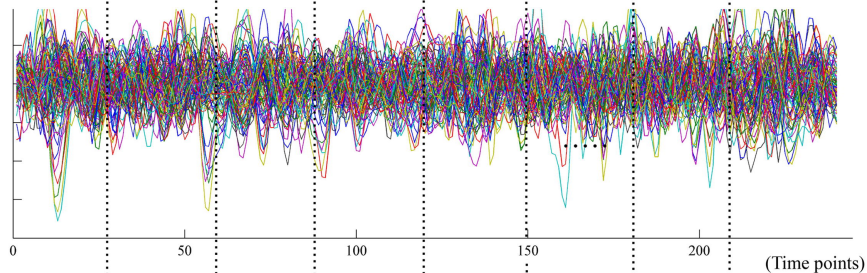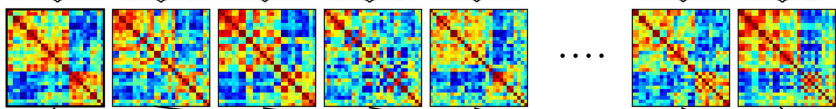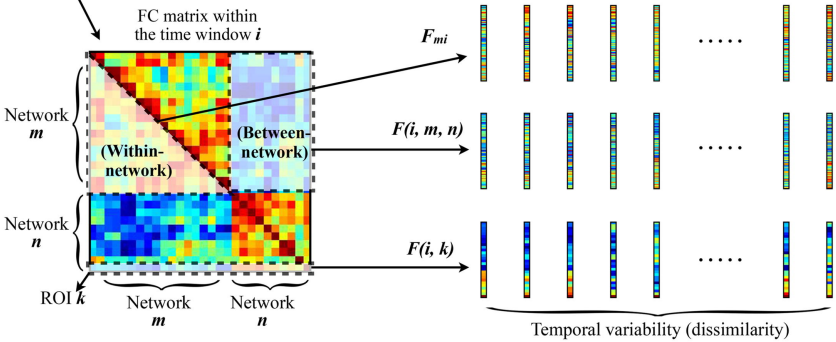

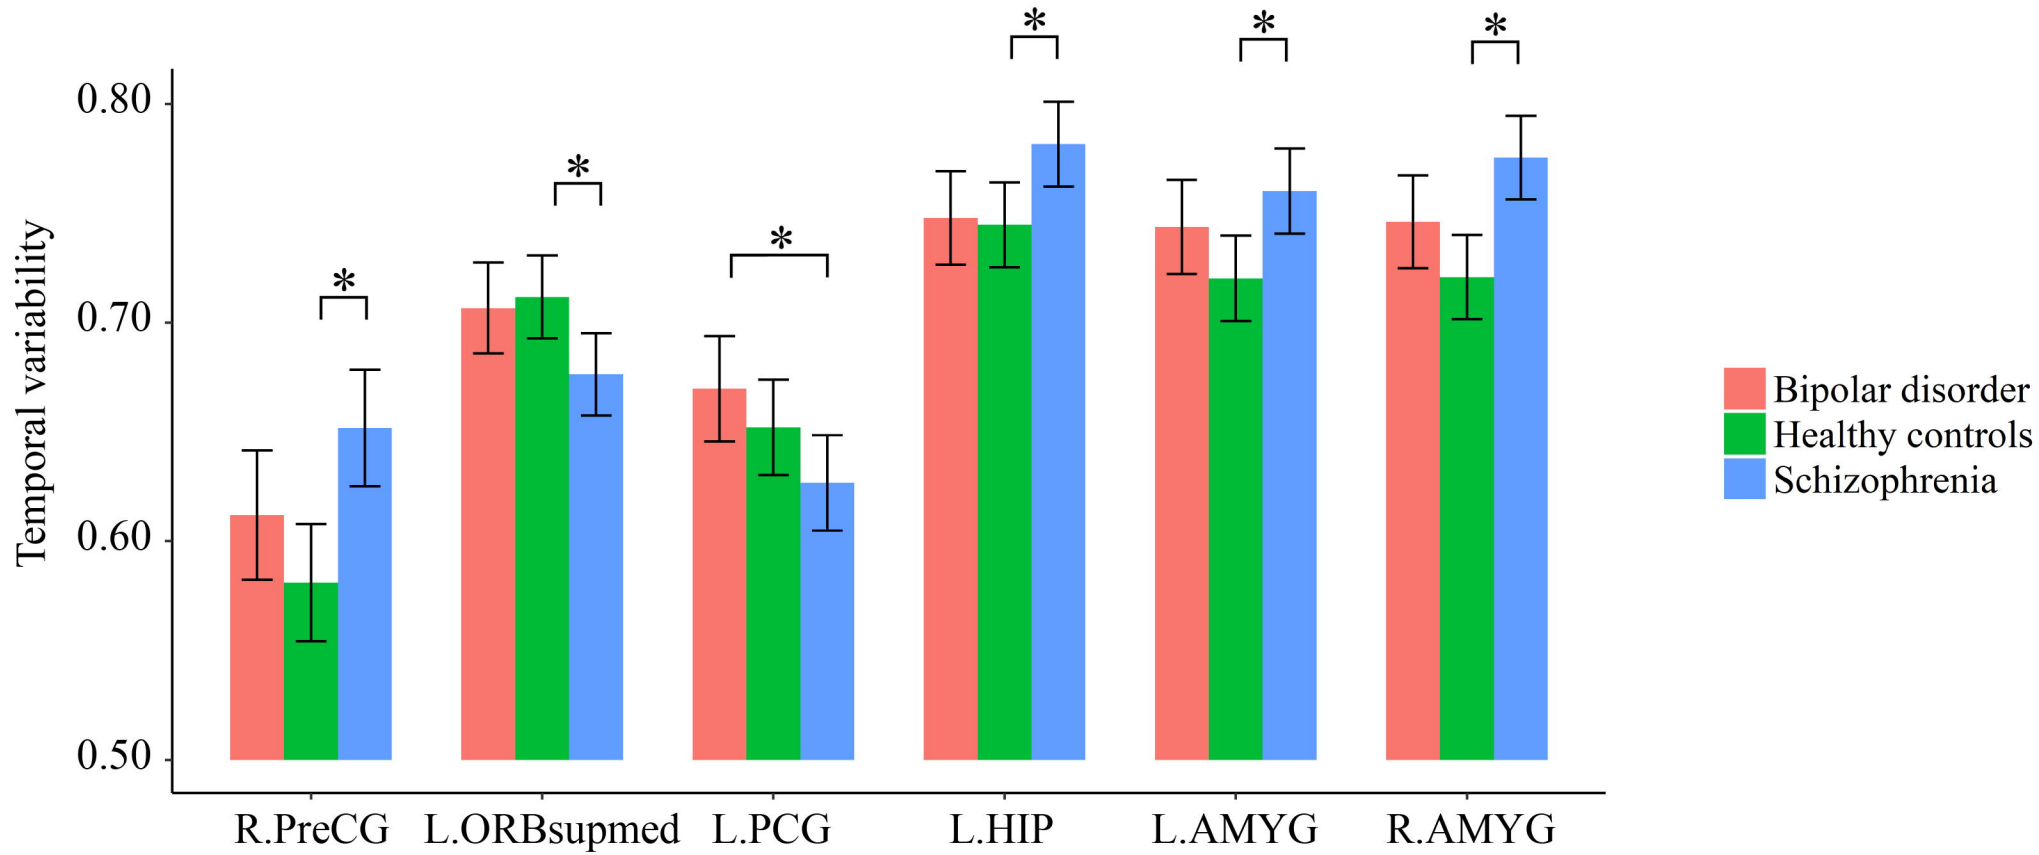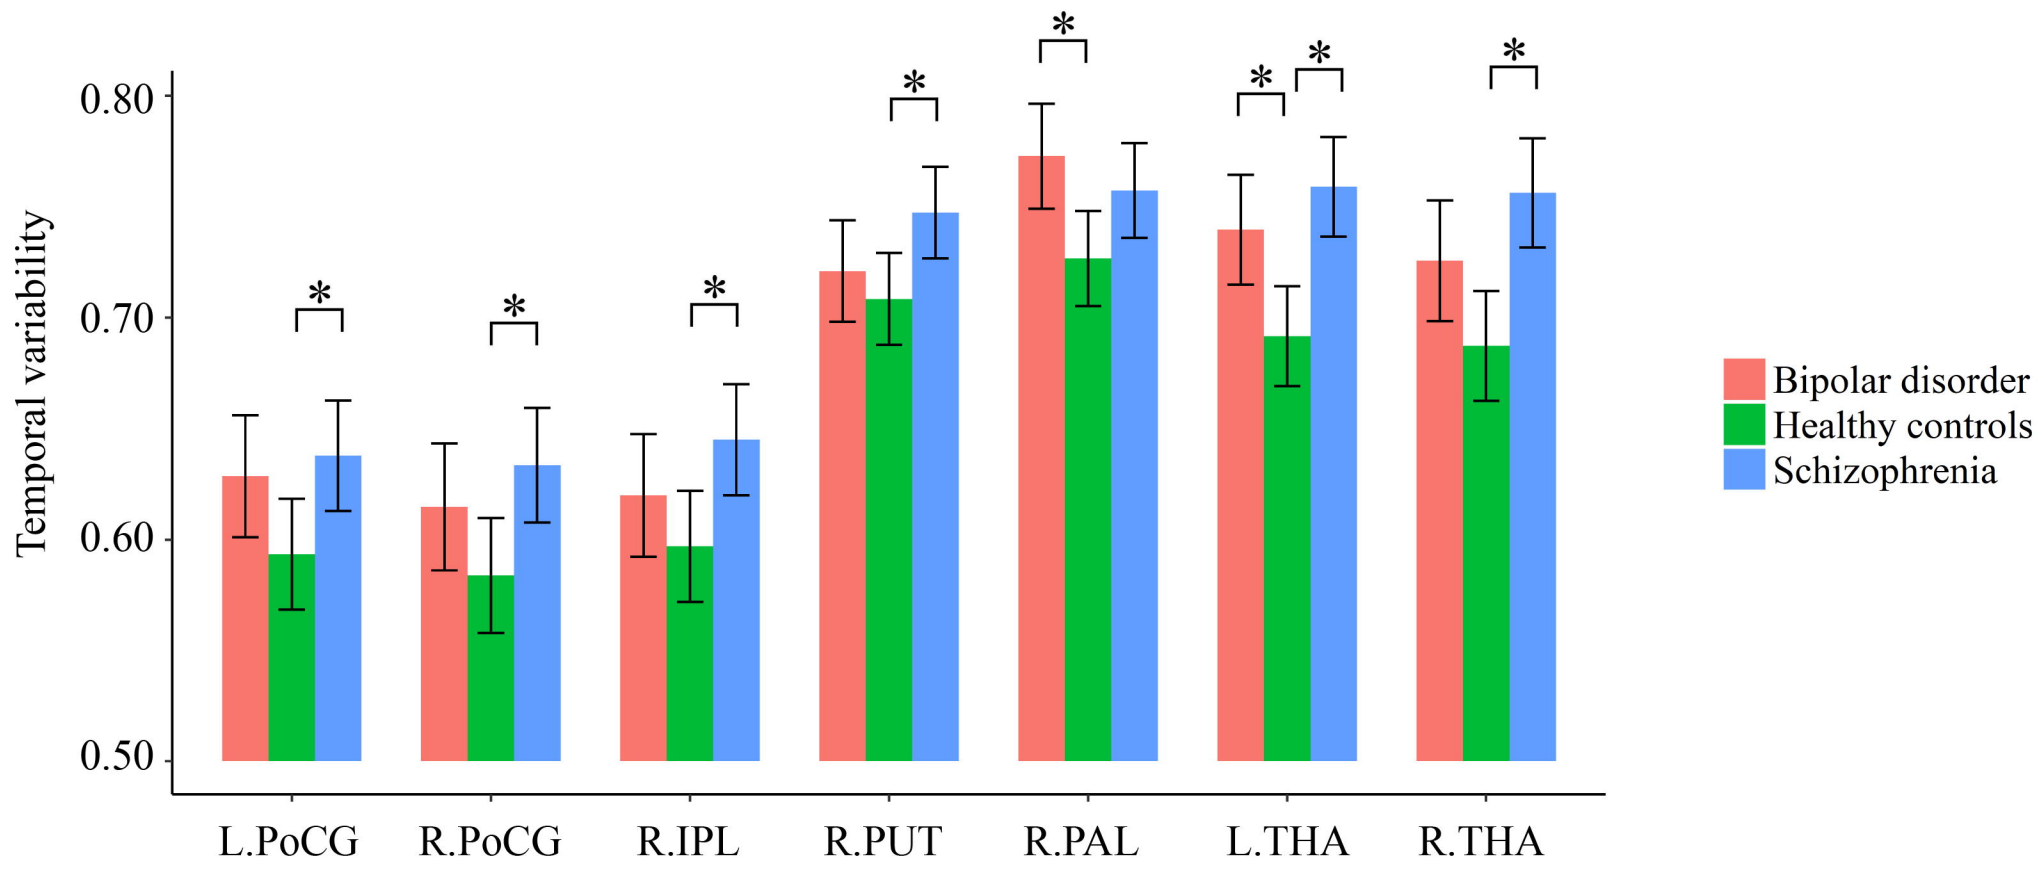

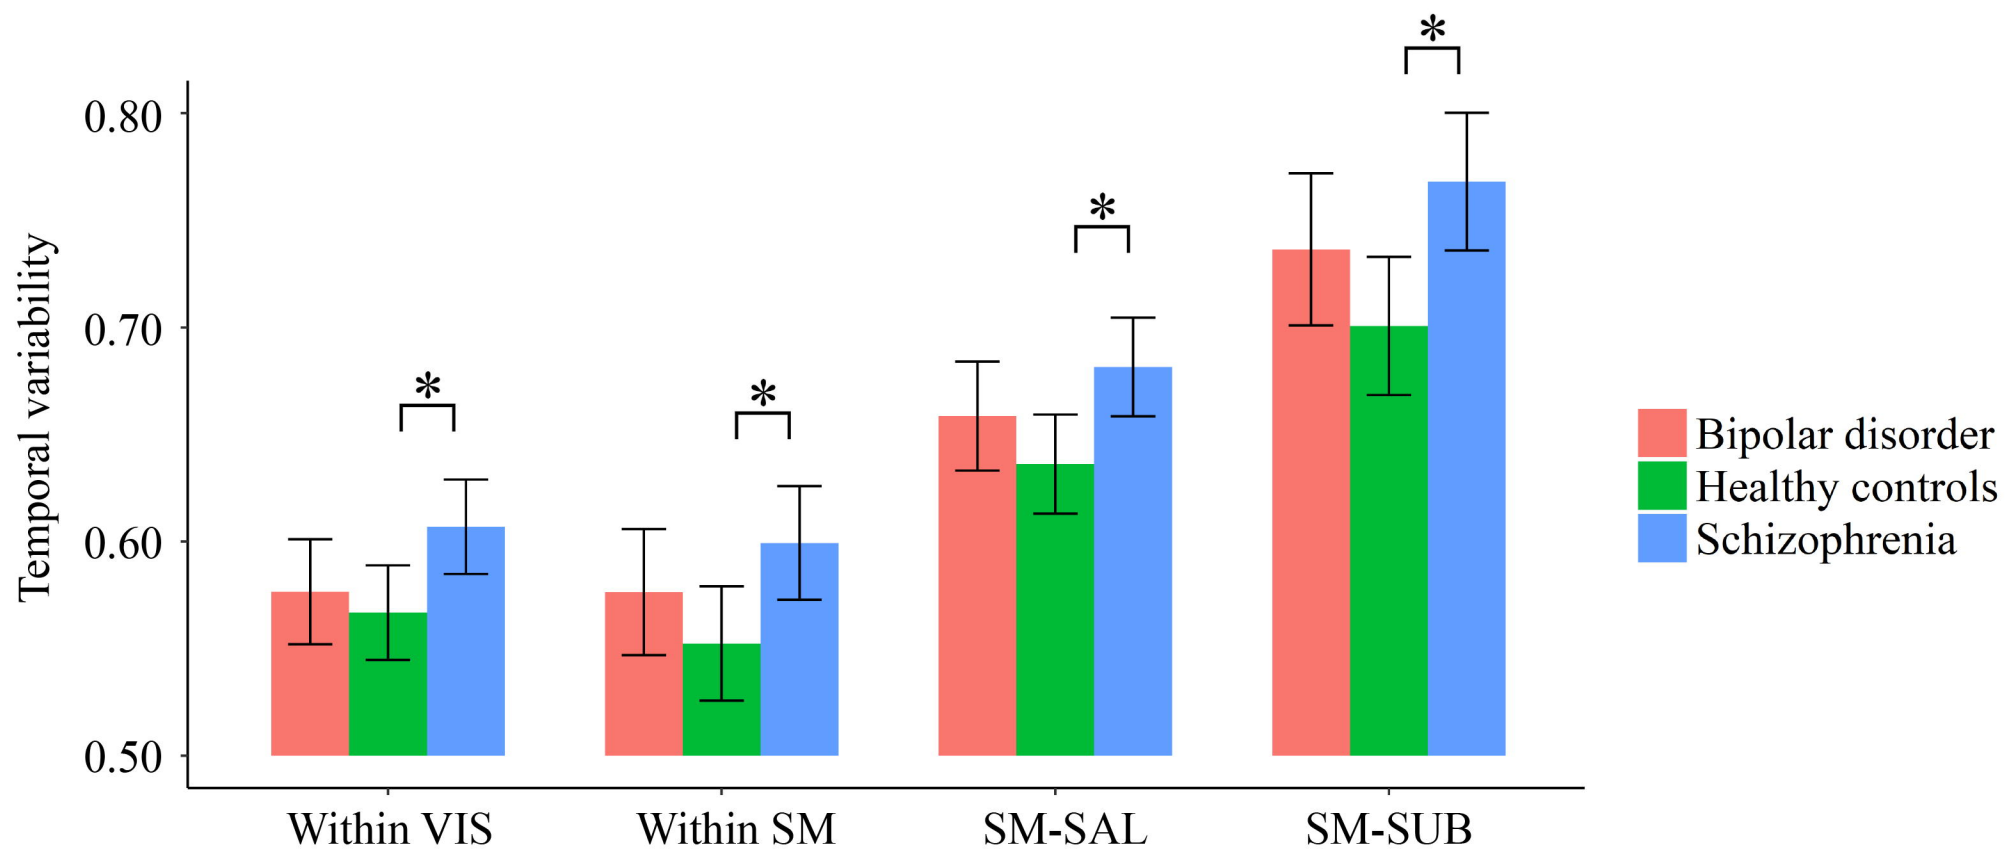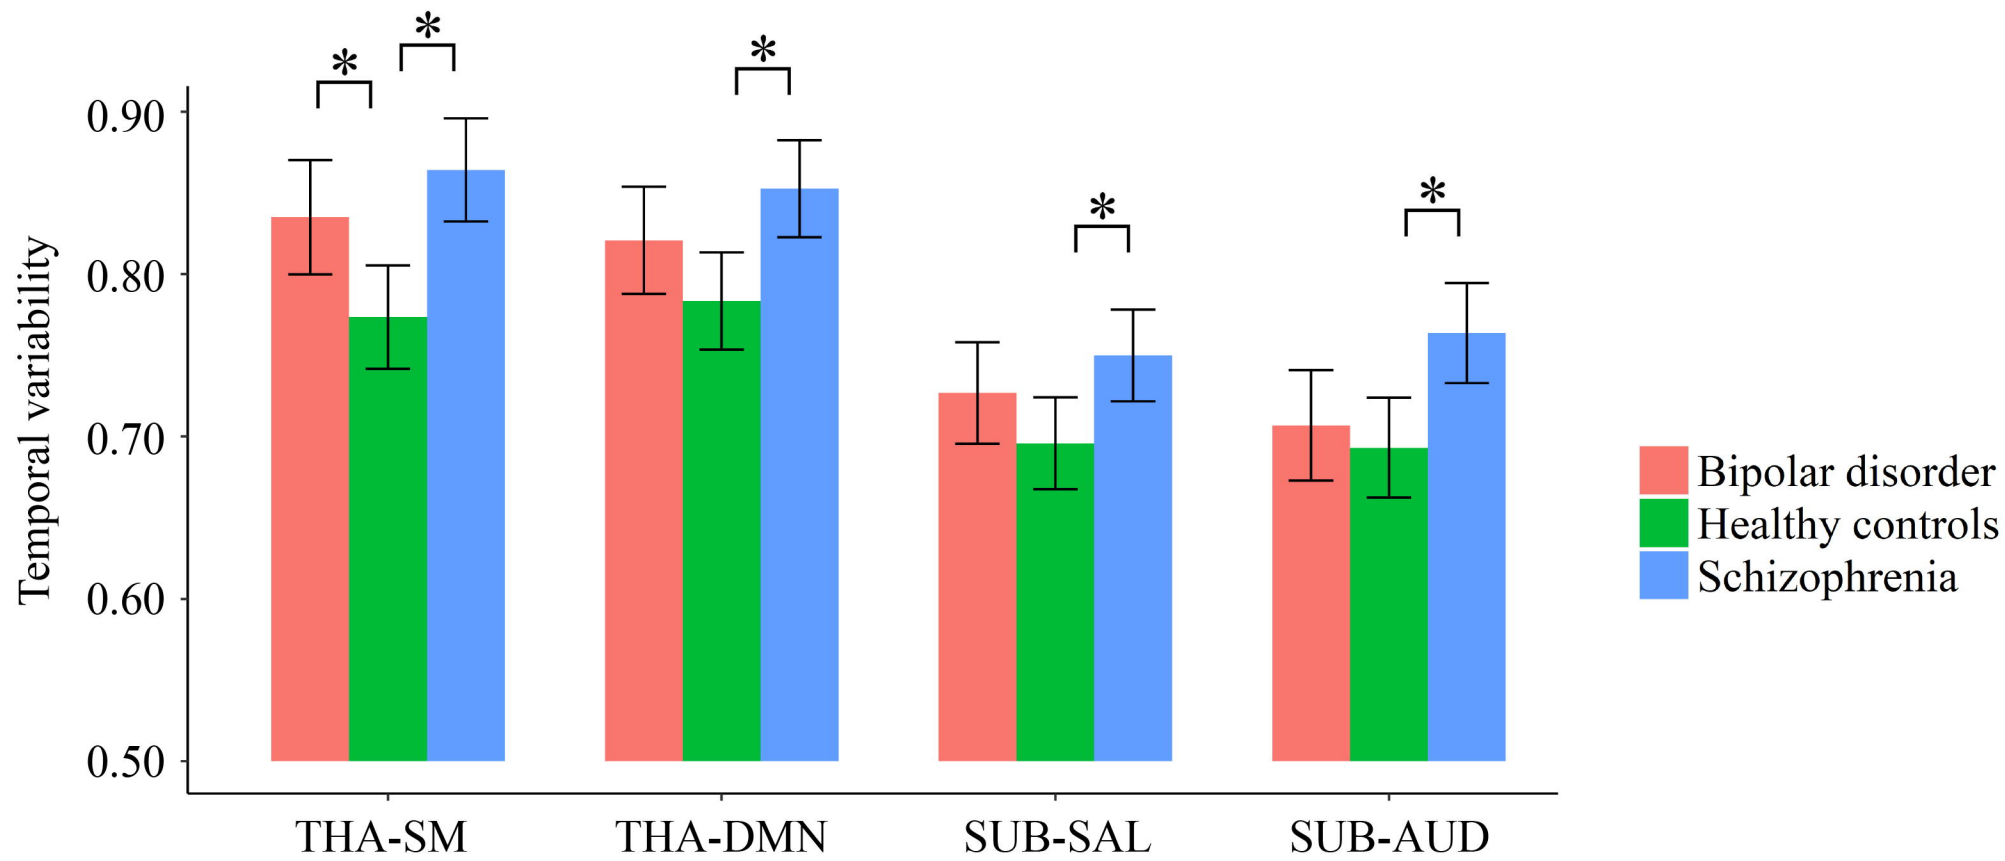

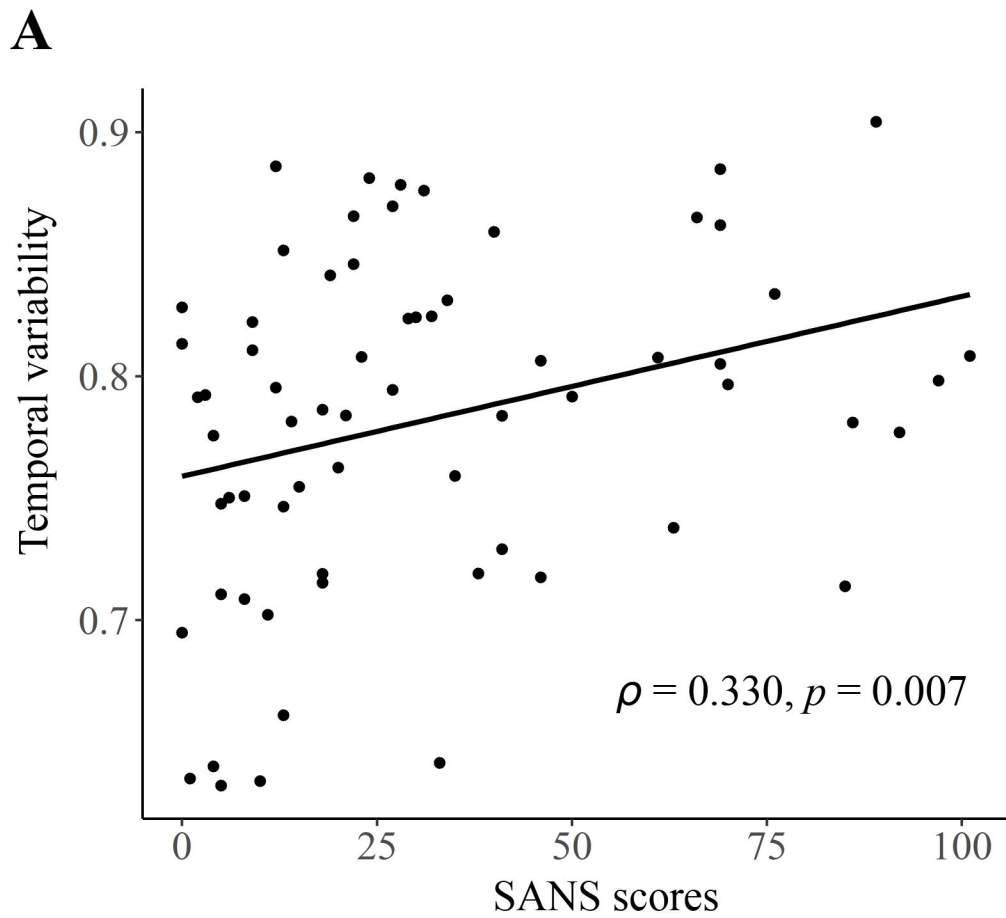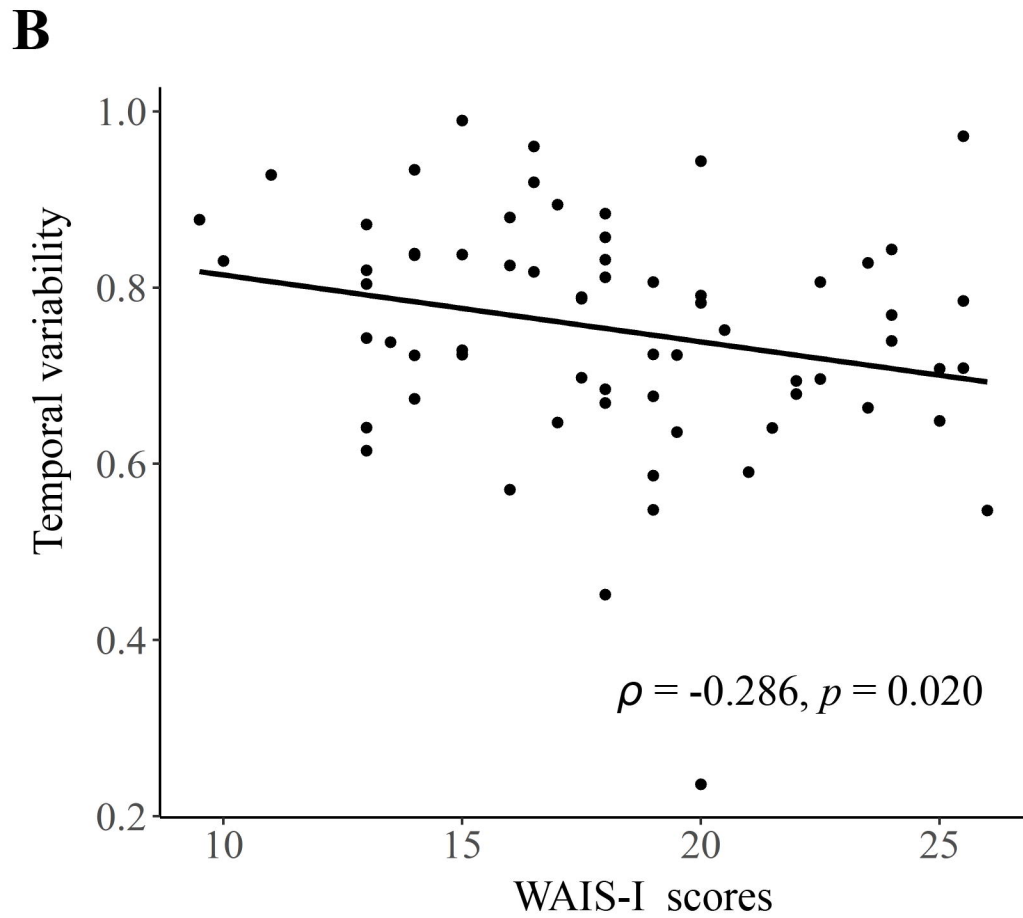

Source: https://www.biorxiv.org/content/10.1101/2020.02.04.934638v1.full.pdf
